1

2 **Title**

3 Wetland plant evolutionary history influences soil and endophyte microbial community  
4 composition

5

6 **Short Title**

7 Implications of plant evolution on wetland microbiomes

8

9 **Authors**

10 Marisa B. Szubryt<sup>1</sup>, Kelly Skinner<sup>2</sup>, Edward J. O'Loughlin<sup>2</sup>, Jason Koval<sup>3</sup>, Stephanie M.  
11 Greenwald<sup>2</sup>, Sarah M. Owens<sup>2</sup>, Kenneth M. Kemner<sup>2</sup>, and Pamela B. Weisenhorn<sup>2</sup>

12

13 **Affiliations**

14 <sup>1</sup>Southern Illinois University, School of Biological Sciences, Carbondale Illinois 62901

15 <sup>2</sup>Argonne National Laboratory, Biosciences Division, Lemont Illinois 60439

16 <sup>3</sup>University of Chicago, Biological Sciences Division, Chicago Illinois 60615

17

18 **Keywords**

19 Microbiome, methane flux, methanogen, methanotroph, wetland, evolution

20

21

22

23 **Abstract**

24 Methane is a microbially derived greenhouse gas whose emissions are highly variable  
25 throughout wetland ecosystems. Differences in plant community composition account  
26 for some of this variability, suggesting an influence of plant species on microbial  
27 community structure and function in these ecosystems. Given that closely related plant  
28 species have similar morphological and biochemical features, we hypothesize that plant  
29 evolutionary history is related to differences in microbial community composition. To  
30 examine species-specific patterns in microbiomes, we selected five monoculture-  
31 forming wetland plant species based on the evolutionary distances among them. We  
32 detected significant differences in microbial communities between sample types  
33 (unvegetated soil, bulk soil, rhizosphere soil, internal root tissues, and internal leaf  
34 tissues) associated with these plant species based on 16S relative abundances. We  
35 additionally found that differences in plant evolutionary history were correlated with  
36 variation in microbial communities across plant species within each sample type. Using  
37 qPCR, we observed substantial differences in overall methanogen and methanotroph  
38 population sizes between plant species and sample types. Methanogens tended to be  
39 most abundant in rhizosphere soils while methanotrophs were the most abundant in  
40 roots. Given that microbes influence methane flux and that plants affect methanogen  
41 and methanotroph populations, plant species contribute to variable degrees of methane  
42 emissions. Incorporating the influence of plant evolutionary history into future modeling  
43 efforts may improve predictions of wetland methane emission since microbial  
44 community differences correlate with differences in plant evolutionary history.

45

46

## 47 **Introduction**

48           Wetlands are globally important ecosystems which are responsible for 20-39% of  
49 global methane emissions (IPCC 2007). Methane is largely a microbially derived  
50 greenhouse gas that is 25 times more potent than carbon dioxide when considered over  
51 a 100-year horizon (Boucher *et al.* 2009) and is an important component of global  
52 climate change (Cao *et al.* 1998). Wetlands contain heterogeneous soils with spatial  
53 and temporal variation in oxidation-reduction (redox) potentials that affect microbial  
54 communities as well as controlling microbial metabolic processes (Conrad 1996;  
55 Megonigal 2004; Pett-Ridge and Firestone 2005), including the production and  
56 consumption of methane. The presence of abundant anoxic soil habitats within wetlands  
57 allow for the growth of methane-producing microbes known as methanogens.

58           Methane emissions from wetlands are a highly variable and difficult to accurately  
59 interpolate component of global climate change models (Bartlett *et al.* 1989; Ringeval *et al.*  
60 *et al.* 2010; Yavitt and Knapp 1998). Temporal and spatial heterogeneity in methane  
61 emissions can be partially explained by differences in plant activity (Wang and Han  
62 2005) and species composition (Chanton *et al.* 1989; Grünfeld and Brix 1999). Thus,  
63 the influence of wetland plants on methane emissions may be a consequence of their  
64 effect on methanogens and methane-consuming microbes known as methanotrophs.  
65 Wetland soil microbial communities may be affected by plant species-specific variation  
66 in the abundance and form of organic matter available or from differences in radial

67 oxygen loss (Fechner-Levy and Hemond 1996; Grünfeld and Brix 1999; Hackstein and  
68 Steinbüchel 2010).

69 Many wetland plants have evolved a spongy tissue known as aerenchyma  
70 (Evans 2004). Aerenchyma permits aerobic root respiration under anoxic soil conditions  
71 by facilitating oxygen transport from leaf to root tissues (Visser *et al.* 2000).  
72 Aerenchyma can also function as a conduit for methane release from soil to the  
73 atmosphere (Colmer 2003; Yavitt and Knapp 1998), as gases can diffuse 10,000 times  
74 faster through gas-filled plant tissues than through water filled soil pores. Conductive  
75 flow rates through aerenchyma can vary drastically by plant species (Brix *et al.* 1992).  
76 For example, *Phragmites australis* and *Typha domingensis* have rates two orders of  
77 magnitude greater than other wetland plants (Brix *et al.* 1992; Konnerup *et al.* 2011).  
78 Differences in flow rates may result from variation in the total volume or type of  
79 aerenchyma (Jung *et al.* 2008). Plants species which are close evolutionary relatives  
80 and occupy similar habitats frequently have similar aerenchyma morphology (Jung *et al.*  
81 2008; Visser *et al.* 2000), thus may similarly influence oxygen diffusion through roots  
82 and into adjacent soil (Visser *et al.* 2000). This radial oxygen loss can subsequently  
83 change soil redox potentials (Colmer 2003), influencing microbial communities (Conrad  
84 1996; Nikolausz *et al.* 2008) by altering the thermodynamic favorability of specific  
85 microbial metabolic reactions.

86 Wetland plant species may also influence microbial community structure and  
87 function through the production of organic matter via senesced tissues (Findlay *et al.*  
88 2002; Newell *et al.* 1995) and root exudates (Bertin *et al.* 2003). Differences in plant  
89 productivity and biomass (Clarke and Baldwin 2002) have been shown to correlate with

90 differences in leaf litter chemistry (Hobbie 1992) and root exudate production (Valé *et al.*  
91 2005) in other ecosystems. Further, these differences in organic matter inputs may be  
92 related to plant evolutionary history (Reich *et al.* 2003). Wetland plants may produce  
93 lineage-specific root exudates to recruit particular microbial symbionts as occurs in  
94 other ecosystems (Bais *et al.* 2006; Haichar *et al.* 2014). Such interspecific differences  
95 in the quality and quantity of aboveground plant litter (Davis and van der Valk 1978) and  
96 root exudates (Bais *et al.* 2006), particularly low-molecular weight compounds, are  
97 known to affect adjacent soil microbial communities by altering resource availability  
98 (Conrad 1996; Westermann *et al.* 1989).

99         In addition to their effects on soil-dwelling microbes, plants are hosts to their own  
100 endophytic microbial communities. Unique endophyte communities may reside in  
101 specific plant tissues (Bai *et al.* 2015; Hardoim *et al.* 2015; Llíros *et al.* 2014; Ma *et al.*  
102 2013) or specific host taxa (Li *et al.* 2013; Winston *et al.* 2014). Endophytic microbial  
103 community composition is influenced both by environmental factors (Hardoim *et al.*  
104 2015; Ma *et al.* 2013) and conditions within host tissues (Espinosa-Garcia and  
105 Langenheim 1990; Sun *et al.* 2008; Wemheuer *et al.* 2017). Plant tissues may provide  
106 more stable conditions relative to stochastic soil environments (Hallmann *et al.* 1999;  
107 Rosenblueth and Martínez-Romero 2006). However, endophytic microbial communities  
108 can also be directly influenced by the host immune system (Bulgarelli *et al.* 2012),  
109 biochemistry (Hardoim *et al.* 2008; Mengoni *et al.* 2010), and additional stressors  
110 (Helander *et al.* 1993). Evolutionarily conserved physiological and biochemical  
111 differences among plant species (Bohlmann *et al.* 1998; Giannasi 1978; Wink 2003)  
112 likely contribute to differences in endophytic microbial communities.

113           This study examines whether wetland plant evolutionary history influences the  
114 composition of soil and endophyte microbial communities with an emphasis on  
115 methanogen and methanotroph populations. Specifically, we hypothesized that more  
116 closely related plant species would have more similar microbial communities in each of  
117 four sample types along an anoxic to oxic gradient: bulk soil, rhizosphere soil, root  
118 tissue, and leaf tissue. We expected that oxygen-sensitive methanogen population sizes  
119 would decrease along this gradient from bulk soil to leaf tissue and that oxygen-  
120 dependent methanotroph population sizes would follow the inverse pattern, increasing  
121 from bulk soil to leaf tissue. This study illuminates the relationship between host  
122 evolutionary distances and microbial community dissimilarities within sample types.  
123 Further, we highlight variability in methanogen and methanotroph populations among  
124 plant species and sample type.

125

126

## 127 **Materials and Methods**

### 128 *Plant selection and sample collection*

129           Five monoculture-forming wetland plant species in the grass order Poales were  
130 selected to examine the influence of individual species on soil and endophyte microbial  
131 communities. Species sampled include representatives of the cattail (*Sparganium*  
132 *eurycarpum* Engelm., *Typha* × *glauca* Godr.), true grass (*Phalaris arundinacea* L.,  
133 *Phragmites australis* (Cav.) Trin. ex Steud.), and sedge (*Bolboschoenus fluviatilis* (Torr.)  
134 Soják) families. The cattail family species have been reported as obligate wetland plants  
135 with efficient aerenchyma and high flooding tolerance that are typically poor competitors

136 under drier conditions (Day *et al.* 1988; Sulman *et al.* 2013; Tuchman *et al.* 2009; USDA  
137 2017). The true grass and sedge species have been defined as facultative wetland  
138 plants with aerenchyma and occupy less intensely and less frequently flooded habitats  
139 (Brix *et al.* 1992; Davis and van der Valk 1978; Kercher and Zedler 2004; Wetzel and  
140 van der Valk 1998). The evolutionary history and phylogenetic distances of these taxa  
141 have been well studied (Givnish *et al.* 2010).

142 Three replicate individuals of each species were sampled at one of two sites:  
143 wetland one, where *B. fluviatilis*, *P. australis*, and *T. × glauca* were located, and wetland  
144 two, where *P. arundinacea* and *S. eurycarpum* were located. These wetlands were  
145 within 500 m of each other and were hydrologically connected. We collected four  
146 sample types (bulk soil, rhizosphere soil, root tissue, leaf tissue) from each individual to  
147 test the effects of plant species on soil and endophytic microbial communities.  
148 Additionally, we collected three replicates of unvegetated soil at least one meter away  
149 from visible plant shoots at each site. Unvegetated and bulk soils were collected using a  
150 16 cm deep, 2 cm diameter PVC core. Bulk soil was collected between 10 cm and 30  
151 cm away from plant shoots. Rhizosphere soil was collected by digging up an intact plant  
152 root system and collecting soil adhered to the roots. Soil samples were placed on dry  
153 ice in the field. Each root sample consisted of four randomly selected root sections  
154 collected from a single plant. A randomly selected, mature, non-senescent leaf from  
155 each plant was also collected.

156

157 *Sample Preparation and Sequencing*

158           Roots and leaves were initially rinsed with tap water followed by deionized water.  
159   We then surface sterilized 1 cm-portions by placing them in a 95% ethanol solution for  
160   30 s. Tissues were then transferred to a 10% bleach solution for 3 min followed by a  
161   70% ethanol solution for 3 min to remove DNA from the outer surface (Cao *et al.* 2004).  
162   Soil cores from unvegetated and bulk soil were homogenized and sampled to avoid  
163   contamination with root material. Rhizosphere soil was gently scraped from the surface  
164   of roots directly into bead-beating tubes.

165           We used the DNeasy PowerSoil Kit (Qiagen) to extract microbial gDNA from 250  
166   mg wet weight of each sample. The protocol for this kit was followed, with the addition  
167   of an initial ten-minute heating step at 65°C in accordance with the Earth Microbiome  
168   Project DNA extraction protocol (Gilbert *et al.* 2014; Marotz *et al.* 2017). Extracted DNA  
169   was stored in a -80°C freezer until sequencing. The 515F  
170   (GTGYCAGCMGCCGCGGTAA) and 806R (GGACTACNVGGGTWTCTAAT ) primers  
171   were used to amplify the V4 region of the prokaryotic 16S rRNA gene (Bergmann *et al.*  
172   2011; Caporaso *et al.* 2012; Lundberg *et al.* 2013). Peptide nucleic acid (PNA)-clamps  
173   were included in the master mix for root and leaf tissues to minimize plant  
174   mitochondrion (GGCAAGTGTCTTCGG) and chloroplast (GGCTCAACCCTGGACAG)  
175   amplification (Lundberg *et al.* 2013). PCR amplification consisted of 45 s at 95°C,  
176   followed by 34 cycles of 95°C for 15 s, 78°C for 10 s, 60°C for 30 s, and extension 72°C  
177   for 30 s. The program terminated with a cooldown to 4°C. The Environmental Sample  
178   Preparation and Sequencing Facility at Argonne National Laboratory sequenced the  
179   amplicon libraries using the Illumina Mi-Seq platform with V3 chemistry.



180 Quantitative PCR (qPCR) was performed in triplicate to determine methanogen  
181 and methanotroph abundances by amplifying the *mcrA* (Steinberg and Regan 2009)  
182 and *pmoA* genes (Kolb *et al.* 2003), respectively. The primers *mcrA* mlasFW (GGTGGT  
183 GTMGGDTTCACMCARTA) and *mcrA*RV (CGTTCATBGCGTAGTTVGGRTAGT) were  
184 used to determine the gene copy number and abundance of methanogens in each  
185 sample. The primers *pmoA* (MTOT) A189 FW (GGNGACTGGGACTTCTGG) and *pmoA*  
186 (MTOT) mb661RV (CCGGMGCAACGTCYTTACC) were used to determine gene copy  
187 number of methanotrophs. Unlike *mcrA* which has a single copy per cell, two copies of  
188 the *pmoA* gene are frequently present (Kolb *et al* 2003). DNA was quantified using  
189 PicoGreen. Two microliters of DNA extract, containing 0.5 ng/ $\mu$ L to 10.0 ng/ $\mu$ L DNA,  
190 were added to each well containing master mix. Samples were amplified on a Roche  
191 LightCycler 480 instrument. The *pmoA* gene was amplified at 95°C for 5 min followed by  
192 50 cycles of 95°C for 20 s, 65°C for 20 s, and 72°C for 45 s. The *mcrA* gene was  
193 amplified at 95°C for 5 min followed by 50 cycles of 95°C for 30 s, 55°C for 45 s, and  
194 72°C for 30 s. The *Methanobacterium thermautotrophicum mcrA* gBlock was used as a  
195 quantification standard. The *Methylococcus capsulatus pmoA* gBlock was used for  
196 methanotroph quantification. The gBlocks gene copy curve ranged from 10<sup>1</sup> to 10<sup>8</sup>  
197 copies/ $\mu$ L.

198

### 199 *Plant phylogenetic distance*

200 Internal transcribed spacer data from the five study plants (*B. fluviatilis*, *P.*  
201 *arundinacea*, *P. australis*, *S. eurycarpum*, and *T. latifolia*, the latter a parent species of  
202 *T. × glauca*) were downloaded from GenBank, along with the outgroup *Sabal minor*.

203 Sequences were aligned in SeaView (Galtier *et al.* 1996) using Muscle (Edgar 2004).  
204 Parsimony heuristic phylogenetic analyses were conducted in PAUP v4.0 (Swofford  
205 2002) with *S. minor* as an outgroup. Patristic phylogenetic distances were calculated  
206 from total branch lengths between plant species (SFig. 1).

207

## 208 *Data Analysis*

209 Sequence data were processed using QIIME (Caporaso *et al.* 2010) and  
210 UPARSE (Edgar 2013). Reads were paired and demultiplexed using QIIME while  
211 unpaired reads, reads with barcode errors, reads of incorrect length, and sequences  
212 with a quality below q20 were removed. Next, sequences were dereplicated, sorted by  
213 size, had singletons removed, and clustered *de novo* using the UPARSE algorithm  
214 (Edgar 2013) with operational taxonomic units (OTUs) assigned at 97% sequence  
215 identity. All remaining data analyses were conducted using R v3.4.3 (R Core Team  
216 2013).

217 Shannon diversity values were calculated for each sample using the vegan  
218 package (Oksanen *et al.* 2007). All samples contained greater than 10,000 reads and  
219 were therefore included in diversity analyses. ANOVA and Tukey's honest significant  
220 difference (HSD) tests were used to determine differences in diversity among sample  
221 types, plant species, and sites (de Mendiburu 2017). Relative abundance data were  
222 used for all compositional analyses to account for differences in sampling depth.  
223 ANOSIM and PERMANOVA analyses were conducted to determine the relative effects  
224 of sample type, plant species, and wetland site using the base and vegan packages in  
225 R, respectively. These results were visualized using non-metric multidimensional

226 scaling (NMDS) ordinations produced using vegan. Analyses and NMDS visualization  
227 were performed for all sample types and each sample type separately to examine the  
228 effects of sample type, plant species, and site. To evaluate the influence of plant  
229 evolutionary history on the composition of microbial communities, Mantel tests were  
230 used to compare the evolutionary distances among plant species with the Bray-Curtis  
231 distances among microbial communities and were performed for each sample type  
232 individually. Differences in methanogen and methanotroph population sizes among  
233 sample types and plant species were examined using ANOVA and Tukey's honest  
234 significant difference test. For root and leaf samples, gene copy number per ng of DNA  
235 was reported. Gene copy number for soil samples were reported relative to unvegetated  
236 controls by site to account for background variation in methanogen and methanotroph  
237 population sizes between the sites.

238

239

## 240 **Results**

### 241 *Community Composition*

242 Overall, microbial communities were most strongly influenced by sample type.  
243 Sample type explained 52% of the observed variation across all samples, and microbial  
244 communities clustered distinctly by sample type (ANOSIM  $p=0.001$ ,  $R = 0.86$ ) (SFig. 2).  
245 Conversely, plant species explained 18% of the observed variation across all samples  
246 ( $p=0.001$ ) while wetland site accounted for 7% of the observed variation ( $p=0.001$ ).  
247 Alpha diversity was significantly different among sample types ( $p<0.0001$ ). Rhizosphere  
248 communities had higher Shannon's diversity than bulk soil communities; bulk

249 communities had higher diversity than root communities, which had higher diversity than  
250 leaf communities. There were 13,586 total OTUs in bulk soil samples, 14,972 OTUs in  
251 rhizosphere soil samples, 10,254 OTUs in root samples, and 5,398 OTUs in leaf  
252 samples (Fig. 1). Bulk and rhizosphere soil samples had high numbers of unique OTUs  
253 (1,977 and 2,000, respectively) compared to either root (599) or leaf (302) sample  
254 types. Nearly 40% of all OTUs were shared across all sample types (3,670 or 19.8% of  
255 total), with an additional 3,660 shared among roots and soil types (3,660).

256         Although many microbial orders were present across all sample types, orders  
257 which were abundant in soils tended to be more poorly represented in tissues and vice  
258 versa (Fig. 2). For example, Syntrophobacterales were abundant in bulk soils (8.0%  
259 relative abundance) with decreased relative abundances in rhizosphere soil (5.8%) and  
260 low abundance in both roots and leaves (<5.0% each). Similarly, Bacteroidales were the  
261 most abundant order in rhizosphere soils (6.1%) with decreased abundance in bulk soils  
262 (4.6%) and low abundance in both root and leaf (<2.6%) samples. Burkholderiales were  
263 the most abundant order in roots (12.4%) with lower abundances in all other sample  
264 types (<1.5%). The Rickettsiales were particularly abundant in leaf and root tissues  
265 (70.6% and 7.9%, respectively) but present in low concentrations for all soil samples  
266 (<0.19%). Soil and plant tissues, each with unique selective pressures, were host to  
267 vastly different microbial communities.

268         Within the four sample types considered here, both environmental conditions and  
269 plant species influenced microbial community composition. Acidobacteriales were more  
270 abundant in bulk soils adjacent to the plants in wetland two (*P. arundinacea*, *S.*  
271 *eurycarpum*, 13.7% and 14.7%, respectively) than the plants in wetland one (all plant

272 species < 2.0%). Meanwhile, the cattails *S. eurycarpum* and *T. × glauca* contained higher  
273 quantities of Bacteroidales in their rhizosphere soils than other species (8.0% and  
274 10.0% respectively, others < 4.9%), despite being in different wetlands. Similarly, the  
275 methanotrophic Methylococcales were more abundant in *S. eurycarpum* and *T. ×*  
276 *glauca* roots than roots of other species (13.7% and 23.5% respectively, others < 8.1%).  
277 Rickettsiales were more abundant in the true grasses (*P. arundinacea*, *P. australis*)  
278 roots relative to other species (10.2% and 20.0% respectively, others < 4.7%).  
279 Streptophyta were present in true grass leaves at elevated levels compared to other  
280 species (15.7% and 21.3% respectively, others < 2.9%). Considerable differences in  
281 overall composition at the microbial order level among plant species were also apparent  
282 when considering relative abundances of individual OTU.

283         Across sample types, microbial communities exhibited differences in plant  
284 species-specific clustering at the OTU level (Fig. 3). Compared to other sample types,  
285 leaf microbial communities were the most consistent across plant species. Similarity in  
286 community composition across plant species decreased from leaf through bulk soil  
287 communities, where microbial communities were the most distinct by plant species (Fig.  
288 3). While leaf microbial communities were significantly different from other sample  
289 types, they were barely distinguishable among plant species (ANOSIM  $p=0.001$ ,  
290  $R=0.4296$ ; Permanova  $p=0.001$ ,  $r^2=0.518$ ). Although root microbial communities were  
291 still overlapping among plant species, they differed significantly and exhibited distinct  
292 clustering (ANOSIM  $p=0.002$ ,  $R=0.6459$ ; Permanova  $p=0.001$ ,  $r^2=0.542$ ). Meanwhile,  
293 both rhizosphere and bulk soil communities were significantly different and strongly  
294 clustered by plant species (ANOSIM  $p=0.001$ ;  $R=0.8222$  Permanova  $p=0.001$ ,  $r^2=0.624$

295 and ANOSIM  $p=0.001$ ,  $R=0.8919$ ; Permanova  $p=0.001$ ,  $r^2=0.001$ , respectively). Bulk  
296 soil samples exhibited the most pronounced clustering by plant species.

297 For each sample type, dissimilarity in microbial communities was correlated with  
298 evolutionary distance among the five host plants. Plant evolutionary history was most  
299 closely related to variation in microbial community composition in roots and least in  
300 leaves. Twenty percent of the variation in microbial community composition was  
301 explained by evolutionary distance among plant species for leaf samples (Mantel  
302  $p=0.007$ ,  $r^2=0.2022$ ). Substantially more variation, 53%, in microbial community  
303 composition was explained by evolutionary distance among plant species for root  
304 samples (Mantel  $p=0.001$ ,  $r^2=0.5345$ ). Meanwhile, around 40% of the variation in  
305 microbial community composition could be explained by evolutionary distance among  
306 plant species for both rhizosphere and bulk samples (Mantel  $p=0.002$ ,  $r^2=0.4034$ ;  
307 Mantel  $p=0.001$ ,  $r^2=0.4442$  respectively).

308 Overall, differences in microbial community composition were driven both by  
309 differences in plant evolutionary history and plant species for each sample types. Each  
310 sample type showed different relationships with these factors. Plant species had the  
311 weakest effect on leaf communities and the strongest on bulk soil communities.  
312 Meanwhile, plant evolutionary history had the strongest effect on root microbial  
313 communities and the weakest effect on leaf microbial communities, with an intermediate  
314 effect on both soil communities. Microbial community diversity decreased from bulk soil  
315 through leaf tissues.

316

317 *Methanotroph and Methanogen Populations*

318 *Typha × glauca* contained the most methanotrophs across species in every  
319 sample type, and its closest evolutionary relative sampled, *S. eurycarpum*, contained  
320 the second most methanotrophs in soil samples (Fig.4). *T. × glauca* contained  
321 significantly larger methanotroph population sizes in bulk soils than *S. eurycarpum*,  
322 which contained more than other species (p=0.00456); rhizosphere soils followed the  
323 same pattern (p=0.0102). Both leaves and roots of *T. × glauca* had larger methanotroph  
324 population sizes than other species, although these differences were not significant. *T.*  
325 *× glauca* also contained more methanogens in bulk soils than other species (p=0.0237),  
326 while *S. eurycarpum* leaves contained significantly more methanogens than either *B.*  
327 *fluviatilis* or *P. arundinacea* (p=0.026). Population sizes of both methanogens and  
328 methanotrophs in leaves were at least one order of magnitude smaller than populations  
329 of all other samples, and methanogens were at least one order of magnitude smaller in  
330 roots than all soil samples. Methanogen population size did not exhibit a clear  
331 relationship with plant evolutionary history, but methanotroph population sizes in soils  
332 were considerably larger in the cattails *S. eurycarpum* and *T. × glauca* than the other  
333 plant species.

334 Methane emissions result from the balance between methane consumption and  
335 production. Here we considered the ratio of methanotrophs to methanogens to examine  
336 the potential impact of plant species and evolutionary history on methane emissions.  
337 The methanotroph to methanogen ratio varied considerably across sample types and  
338 plant species (Fig. 4). There was a significant interaction between the effects of plant  
339 species and sample type on the ratio of methanotrophs to methanogens (p=0.012).  
340 Across plant species, the ratio of methanotrophs to methanogens was similar in bulk

341 soil and unvegetated soil (0.087 and 0.089, respectively); however, this ratio was higher  
342 in rhizosphere soil (0.249). Leaves had a greater proportion of methanotrophs to  
343 methanogens (0.769) than all soils. However, leaves still contained more methanogens  
344 than methanotrophs for each plant species except for *T. × glauca*. Roots were the only  
345 sample type where methanotroph population sizes were larger than methanogens and  
346 this effect was both significant ( $p < 0.0001$ ) and pronounced, with a mean methanotroph  
347 to methanogen ratio of 12.2. Populations of both methanotrophs and methanogens  
348 were suppressed in bulk and rhizosphere soils compared to unvegetated soil. The  
349 methanotroph to methanogen ratio varied considerably across sample types,  
350 particularly within roots, and this ratio differed among plant species.

351

352

### 353 **Discussion**

354 Plant-associated microbial community composition sampled from bulk soil,  
355 rhizosphere soil, roots, and leaves differed by both plant species and sample type, with  
356 samples distinctly clustered by sample type. While the majority of endophytic taxa were  
357 also present in soil samples, soil samples contained a greater number of total and  
358 unique OTUs than plant tissues, particularly for the Rickettsiales-dominated leaf  
359 communities. This pattern is consistent with the prevailing hypothesis that many root  
360 and even leaf endophytes are recruited from soil (Zarraonaindia *et al.* 2015).

361 Additionally, differences in the relative abundance of taxa shared between plant tissues  
362 and soil samples were pronounced. Microbial OTUs and orders found to be abundant in  
363 soils were present in low abundances within tissues and vice versa, suggesting



364 recruitment and differentiation of communities within plant tissues. For example,  
365 Rickettsiales, an order of common plant endophytes (Kunda *et al.* 2018), were abundant  
366 in leaf samples for each species and root samples for the true grasses but nearly  
367 absent in other sample types. Meanwhile, the methanotrophic order Methylococcales  
368 was only abundant in root samples and was most abundant in samples from the  
369 Typhaceae. Previous studies have shown that both plant species and environmental  
370 conditions influence microbial communities (Berg and Smalla 2009; Gagnon *et al.*  
371 2007), consistent with our finding that wetland plant species substantially influence  
372 microbial communities within each sample type.

373 Plant evolutionary history was related to variation among wetland microbial  
374 communities across plant tissues and soil samples. Previous studies have reported  
375 dissimilarities in microbial communities relating to phylogenetic distances in the true  
376 grass family under greenhouse conditions (Bouffaud *et al.* 2014). Our study shows that  
377 these differences in plant-associated endophytic and soil microbial communities are  
378 related to phylogenetic distance across the grass order in mature, naturally occurring  
379 wetland plants. The influence of plant evolutionary history on microbial communities is  
380 discernable in the hydrologically similar and physically adjacent wetlands across the  
381 plants sampled here. Further work is required to establish the relative importance of  
382 evolutionary history when considering additional plant lineages and more distinct  
383 wetland sites. Despite the increase in direct control and interaction with the plant, we  
384 found that plant evolutionary history explained the least amount of variation in leaf  
385 microbial communities compared to other sample types. We attribute this to the lower  
386 levels of microbial diversity and richness of unique taxa found in these highly selective

387 environments. While many factors are likely at play, evolutionarily conserved plant  
388 morphology and biochemistry, in the forms of aerenchyma (morphology) and root  
389 exudates and senesced tissues (biochemistry), are likely mechanisms for the  
390 relationship between plant evolutionary history and microbial community composition as  
391 redox potential and substrate availability are known drivers of microbial community  
392 composition in wetlands (Colmer 2003; Conrad 1996; Megonigal 2004).

393         The population sizes of methanotrophs and methanogens within these plant-  
394 associated microbial communities differ by sample type and plant species, offering one  
395 putative explanation for why some variation in methane emissions can be explained by  
396 plant species composition (Wang and Han 2005; Yavitt and Knapp 1998). Factors  
397 known to influence methane-cycling microbes, such as redox potential which can be  
398 influenced by both aerenchyma flow rates and organic matter deposition, vary  
399 considerably across plant species and are phylogenetically conserved (Jung *et al.* 2008;  
400 Visser *et al.* 2000; Reich *et al.* 2003). Despite this, methanogen population sizes did not  
401 exhibit a clear relationship with plant evolutionary history and were relatively stable  
402 across samples in agreement with previous work (Goldberger 2012). Methanotrophs, on  
403 the other hand, showed increases in population size within *T. × glauca*.

404         The combination of highly aerobic roots and high gas diffusivity through *Typha*  
405 (*Brix et al.* 1992; Konnerup *et al.* 2011), particularly for the deeply submerged *T. ×*  
406 *glauca*, may explain the exceptionally large methanotroph population sizes found in  
407 particular plants. A similarly high ratio was not observed in its sister taxon, *S.*  
408 *eurycarpum*, despite a high abundance of Methylococcales in roots, more than the other  
409 species sampled. The particularly large methanotroph to methanogen ratio within *T. ×*

410 *glauca* roots, in combination with closed stomates at night, may explain previous  
411 observations of high carbon dioxide concentrations within *Typha* leaves at night  
412 (Constable *et al.* 1992). *Typha latifolia* has been shown to indirectly consume larger  
413 quantities of methane through root and rhizome associated methanotrophs than wetland  
414 sedges and true grasses (King 1994), indicating that *Typha* species other than *T. ×*  
415 *glauca* may increase methane oxidation in wetlands. This methane utilization may  
416 provide a fitness advantage for *Typha* species as many wetland plants have been  
417 shown to utilize the carbon dioxide produced by methanotrophs for photosynthesis  
418 (Raghoebarsing *et al.* 2005). The impacts these microbes have on their plant hosts'  
419 fitness, particularly regarding the large population sizes of methanotrophs associated  
420 with *T. × glauca* roots, remains unknown but may partially explain why *T. × glauca* can  
421 often successfully invade deeply flooded marsh habitats.

422         Our finding of an increased similarity of microbial community composition with  
423 more closely related species suggests that plant evolutionary history may provide  
424 additional insight into observed variability in wetland methane emissions. For example,  
425 the sampled plant taxa in the Typhaceae, *S. eurycarpum* and *T. × glauca*, harbor high  
426 population densities of methanotroph orders, so wetlands dominated by species within  
427 the Typhaceae may have lower methane emissions than true grass and sedge-  
428 dominated wetlands. Notably, the exceptionally high methanotroph population sizes in  
429 *T. × glauca* roots measured here, in agreement with previous studies on methanotroph  
430 populations in *T. latifolia* roots and rhizomes (King 1994), suggests that wetlands  
431 inhabited by *Typha* species may have particularly low methane emissions. This  
432 conclusion runs counter to predictions based solely on environmental conditions which

433 would suggest that the more deeply submerged wetlands in which *Typha* dominate  
434 would have the greatest potential for methanogenesis and least for methane oxidation.  
435 In addition to providing a potential mechanism underlying the relationship between plant  
436 community composition and the ecosystem processes of methanogenesis and  
437 methanotrophy in wetlands, the relationships between wetland plant species and their  
438 endophytic and soil microbiomes found here potentially affect plant fitness and species  
439 distribution patterns through changes in carbon dioxide availability within plant tissues.

440

441

#### 442 **Acknowledgements**

443 We would like to thank Dion Antonopoulos for his assistance with obtaining the gBlocks  
444 used in qPCR for both methanotroph and methanogen amplification. Theodore Flynn  
445 provided initial guidance in processing the Mi-Seq output data. The Summer  
446 Undergraduate Laboratory Intern (SULI) program, hosted by Argonne National  
447 Laboratory, funded Marisa (Austin) Szubryt during the project's conception and three  
448 other student interns who assisted with project development and review during its early  
449 stages: Maria Pia Ramos, Lauren Sinclair Johnson, and Korbibian Thalhammer. We  
450 wish to thank the Society of Wetland Scientists for providing an undergraduate Student  
451 Research Grant worth \$948 to Marisa Szubryt in spring of 2017. This research is part of  
452 the Wetland Hydrobiogeochemistry Scientific Focus Area (SFA) at Argonne National  
453 Laboratory supported by the Subsurface Biogeochemical Research Program, Office of  
454 Biological and Environmental Research, Office of Science, U.S. Department of Energy  
455 (DOE), under contract DE-AC02-06CH11357.

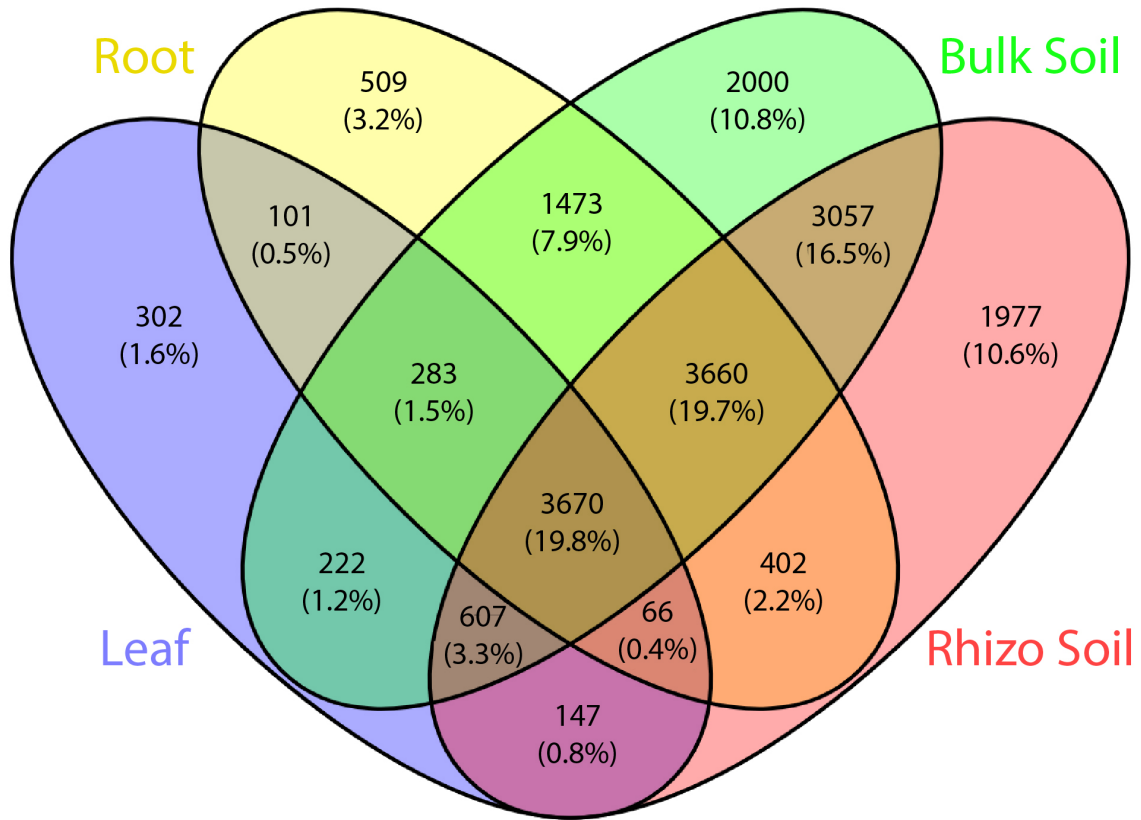

456

457 **Figure 1.** Number of microbial OTUs found in each sample type or shared among

458 sample types. Sample types and combinations are indicated with different colors.

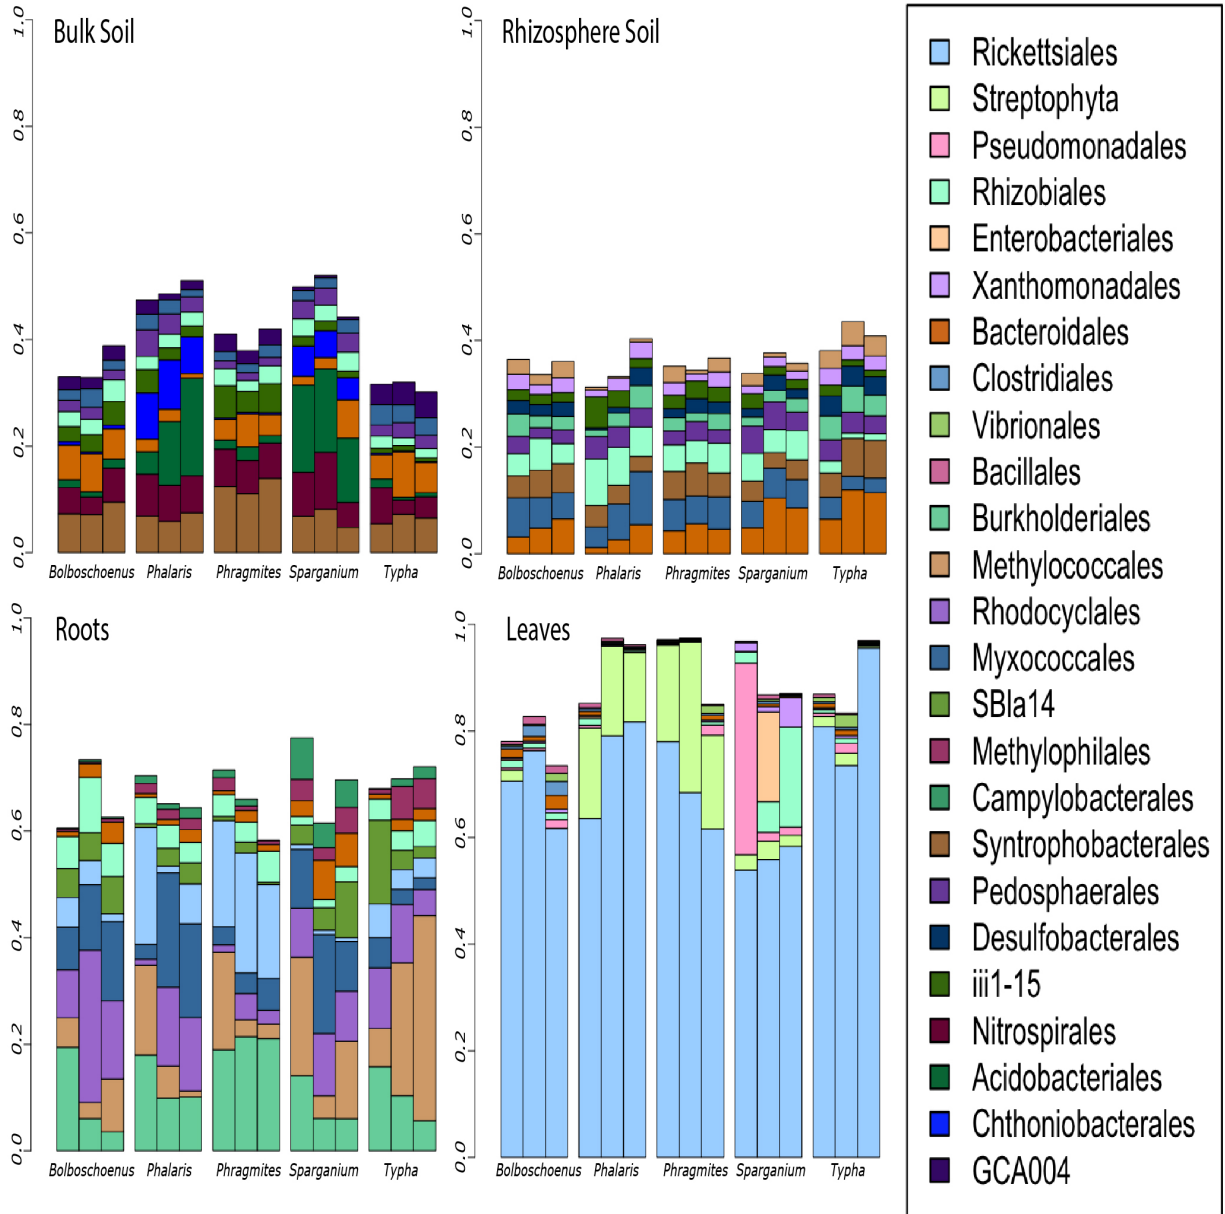

459

460 **Figure 2.** The ten most abundant prokaryote orders for each sample type. Each bar  
 461 represents the relative abundance of taxa within an individual sample, with three  
 462 replicate samples per plant genus. Overall alpha-diversity decreases from bulk soil and  
 463 rhizosphere soil samples through root samples with the least diversity in leaf samples.

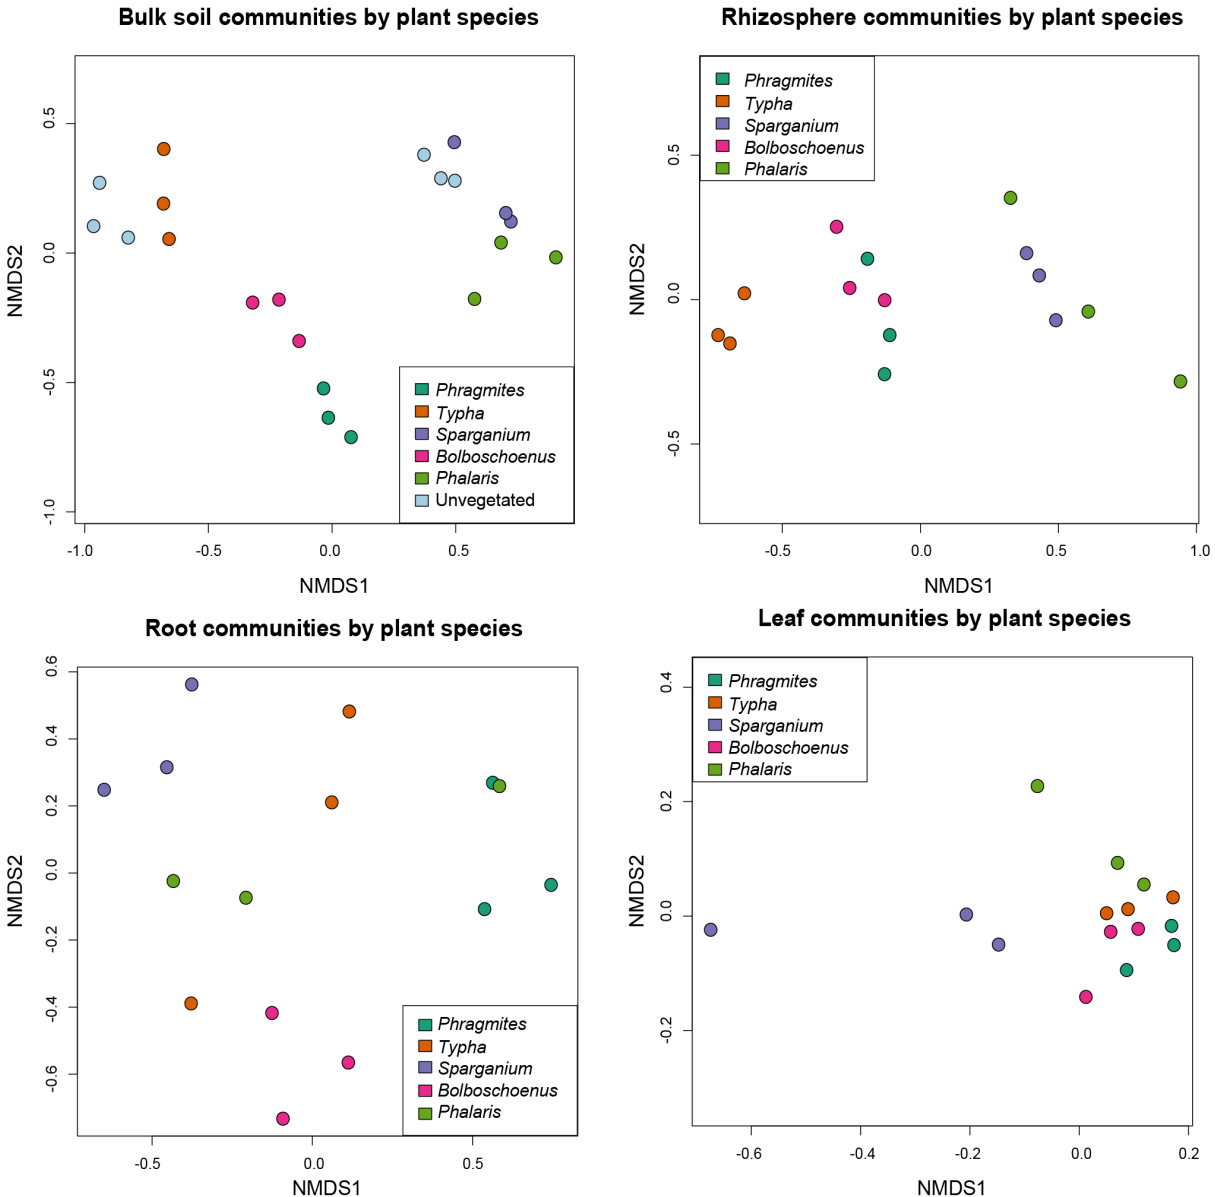

464

465 **Figure 3.** Non-metric dimensional scaling (NMDS) ordination plots representing  
466 dissimilarities in microbial community composition at the OTU level within sample types.  
467 Clustering according to plant species was least distinctive in plant leaves and most  
468 pronounced in soils, particularly bulk soil samples.

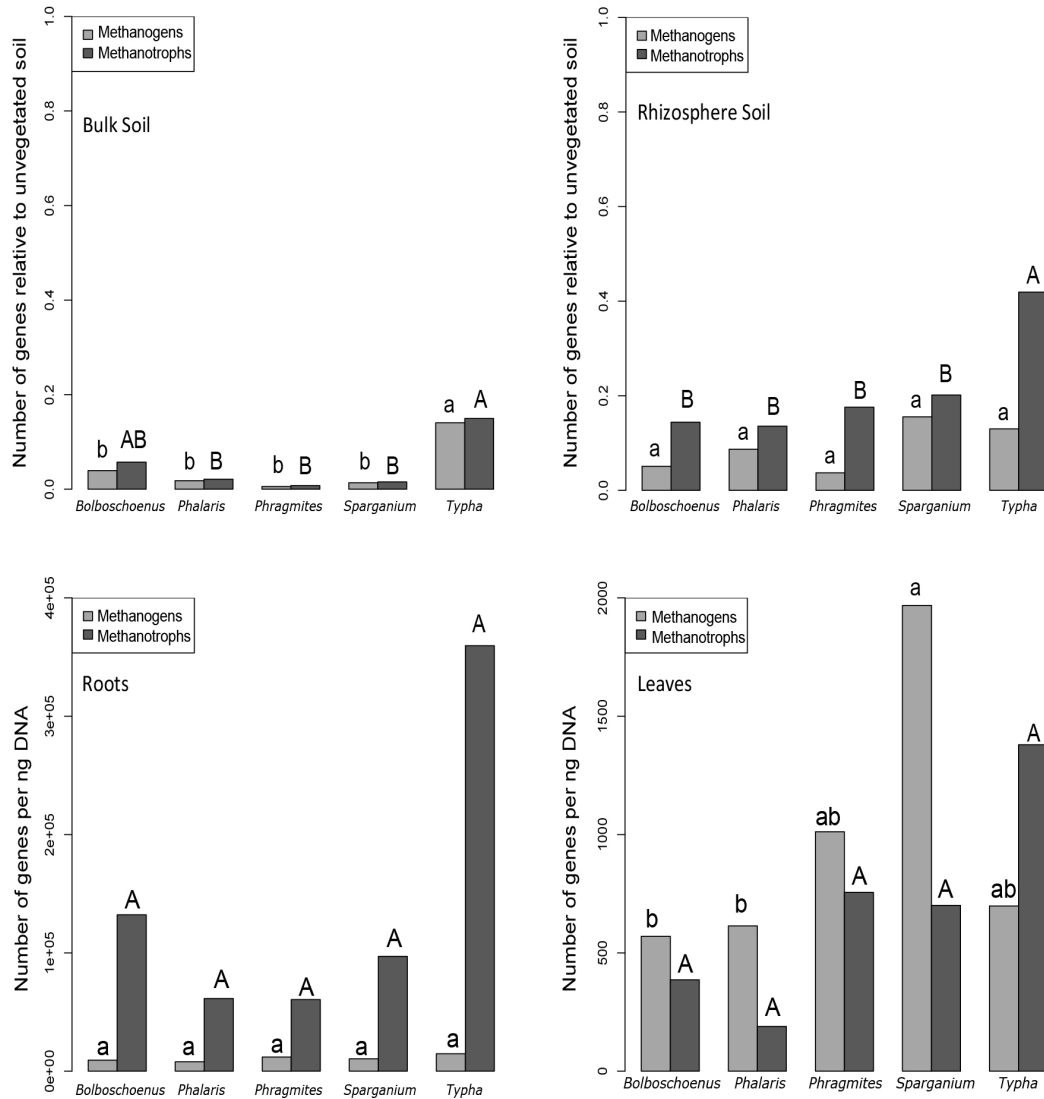

469

470 **Figure 4.** Absolute methanotroph and methanogen abundances normalized to  
471 equivalent DNA concentrations for all samples. Soil samples were adjusted in  
472 proportion to unvegetated soils by site. Letters above bars denote significant differences  
473 between groups according to Tukey's HSD tests for methanogens and methanotrophs  
474 independently. Despite substantial differences in population sizes among roots, no  
475 groups were significantly different.



483 **Literature Cited**

- 484 Bai, Y., Müller, D., Srinivas, G., Garrido-Oter, R., Potthoff, E., Rott, M., Dombrowski, N.,  
485 Münch, P., Spaepen, S., Remus-Emsermann, M., Hüttel, B., McHardy, A.,  
486 Vorholt, J., and Schulze-Lefert, P. 2015. Functional overlap of the *Arabidopsis*  
487 leaf and root microbiota. *Nature* **528**:364-369.
- 488 Bais, H., Weir, T., Perry, L., Gilroy, S., and Vivanco, J. 2006. The role of root exudates  
489 in rhizosphere interactions with plants and other organisms. *Ann. Rev. Plant Biol.*  
490 **57**:233-266.
- 491 Bartlett, D., Batrlett, K., Hartman, J., Harriss, R., Sebacher, D., Pelletier-Travis, E., Dow,  
492 D., and Brannon, D. 1989. Methane emissions from the Florida Everglades:  
493 Patterns of variability in a regional wetland ecosystem. *Global Biogeochem.*  
494 *Cycles* **3**(4):363-374.
- 495 Berg, G. and Smalla, K. 2009. Plant species and soil type cooperatively shape the  
496 structure and function of microbial communities in the rhizosphere. *FEMS*  
497 *Microbiol. Ecol.* **68**:1-13.
- 498 Bergmann, G., Bates, S., Eilers, K., Lauber, C., Caporaso, J., Walters, W., Knight, R.,  
499 and Fierer, N. 2011. The under-recognized dominance of *Verrucomicrobia* in soil  
500 bacterial communities. *Soil Biol. Biochem.* **43**(7):1450-1455.
- 501 Bertin, C., Yang, X., and Weston, L. 2003. The role of root exudates and  
502 allelochemicals in the rhizosphere. *Plant and Soil* **256**:67-83.
- 503 Bohlmann, J., Meyer-Gauen, G., and Croteau, R. 1998. Plant terpenoid synthases:  
504 Molecular biology and phylogenetic analysis. *Proc. Nat. Acad. Sci.* **95**:4126-  
505 4133.

- 506 Boucher, O., Friedlingstein, P., Collins, B., and Shine, K. 2009. The indirect global  
507 warming potential and global temperature change potential due to methane  
508 oxidation. *Env. Res. Lett.* **4**(4):044007.
- 509 Bouffaud, M., Poirier, M., Muller, D., and Moënne-Loccoz, Y. 2014. Root microbiome  
510 relates to plant host evolution in maize and other Poaceae. *Env. Microbiol.*  
511 **16**(9):2804-2814.
- 512 Brix, H., Sorrell, B., and Orr, P. 1992. Internal pressurization and convective gas flow in  
513 some emergent freshwater macrophytes. *Limn. Oceanogr.* **37**(7):1420-1433.
- 514 Bulgarelli, D., Rott, M., Shlaeppi, K., van Themaat, E., Ahmadinejad, N., Assenza, F.,  
515 Rauf, P., Huettel, B., Reinhardt, R., Schmelzer, E., Peplies, J., Gloeckner, F.,  
516 Amann, R., Eickhorst, T., and Schulze-Lefert, P. 2012. Revealing structure and  
517 assembly cues for *Arabidopsis* root-inhabiting bacterial microbiota. *Nature*  
518 **488**:91-95.
- 519 Cao, L., Qiu, Z., You, J., Tan, H., and Zhou, S. 2004. Isolation and characterization of  
520 endophytic *Streptomyces* strains from surface-sterilized tomato (*Lycopersicon*  
521 *esculentum*) roots. *Lett. Appl. Microbiol.* **39**(5):425-430.
- 522 Cao, M., Gregson, K., and Marshall, S. 1998. Global methane emission from wetlands  
523 and its sensitivity to climate change. *Atm. Env.* **32**(19):3293-3299.
- 524 Caporaso, J., Lauber, C., Walters, W., Berg-Lyons, D., Huntley, H., Fierer, N., Owens,  
525 S., Betley, J., Fraser, L., Bauer, M., Gormley, N., Gilbert, J., Smith, G., and  
526 Knight, R. 2012. Ultra-high-throughput microbial community analysis on the  
527 Illumina HiSeq and MiSeq platforms. *ISME J.* **6**:1621-1624

528 Caporaso, J., Kuczynski, J., Stombaugh, J., Bittinger, K., Bushman, F., Costello, E.,  
529 Fierer, N., Gonzalez Pena, A., Goodrich, J., Gordon, J., Huttley, G., Kelley, S.,  
530 Knights, D., Koenig, J., Ley, R., Lozupone, C., McDonald, D., Muegge, B.,  
531 Pirrung, M., Reeder, J., Sevinsky, J., Turnbaugh, P., Walters, W., Widmann, J.,  
532 Yatsunencko, T., Zaneveld, J., and Knight, R. 2010. QIIME allows analysis of  
533 high-throughput community sequencing data. *Nat. Methods* **7**(5):335-336.

534 Chanton, J., Martens, C., and Kelley, C. 1989. Gas transport from methane-saturated,  
535 tidal freshwater and wetland sediments. *Limn. and Oceanogr.* **34**(5):807-819.

536 Clarke, E. and Baldwin, A. 2002. Responses of wetland plants to ammonia and water  
537 level. *Ecol. Eng.* **18**:257-264.

538 Colmer, T. 2003. Long-distance transport of gases in plants: A perspective on internal  
539 aeration and radial oxygen loss from roots. *Plant, Cell and Environ* **26**:17-36.

540 Conrad, R. 1996. Soil microorganisms as controllers of atmospheric trace gases (H<sub>2</sub>,  
541 CO, CH<sub>4</sub>, OCS, N<sub>2</sub>O, and NO). *Micrbiol. Rev.* **60**(4):609-640.

542 Constable, J., Grace, J., and Longstreth, D. 1992. High carbon dioxide concentrations in  
543 aerenchyma of *Typha latifolia*. *Am. J. Bot.* **79**(4):415-418.

544 Davis, C. and van der Valk, A. 1978. The decomposition of standing and fallen litter of  
545 *Typha glauca* and *Scirpus fluviatilis*. *Canadian Journal of Botany* **56**(6):662-675.

546 Day, R., Keddy, P., McNeill, J., and Carleton, T. 1988. Fertility and disturbance  
547 gradients: A summary model for a riverine marsh vegetation. *Ecol. Soc. Am.*  
548 **69**(4):1044-1054.

549 de Mendiburu, F. 2017. *Agricolae: Statistical procedures for agricultural research*. R  
550 package version. <http://CRAN.R-project.org/package=agricolae>

- 551 Edgar, R. 2004. MUSCLE: Multiple sequence alignment with high accuracy and high  
552 throughput. *Nuc. Acids Res.* **35**(2):1792-1797.
- 553 Edgar, R. 2013. UPARSE: highly accurate OTU sequences from microbial amplicon  
554 reads. *Nat. Methods* **10**:996-998.
- 555 Espinosa-Garcia, F. and Langenheim, J. 1990. The endophytic fungal community in  
556 leaves of a coastal redwood population - diversity and spatial patterns. *New*  
557 *Phytol.* **116**:89-97.
- 558 Evans, D. 2004. Aerenchyma formation. *New Phytol.* **161**:35-49.
- 559 Fechner-Levy, E. and Hemond, H. 1996. Trapped methane volume and potential effects  
560 on methane ebullition in a northern peatland. *Limn. Oceanogr.* **41**(7):1375-1383.
- 561 Findlay, S., Dye, S., and Kuehn, K. 2002. Microbial growth and nitrogen retention in  
562 litter of *Phragmites australis* compared to *Typha angustifolia*. *Wetlands*  
563 **22**(3):616-625.
- 564 Gagnon, Y., Chazarneq, F., Comeau, Y., and Brisson, J. 2007. Influence of macrophyte  
565 species on microbial density and activity in constructed wetlands. *Water Sci.*  
566 *Tech.* **56**(3):249-254.
- 567 Galtier, N., Gouy, M., and Gautier, C. 1996. SeaView and Phylo\_win, two graphic tools  
568 for sequence alignment and molecular phylogeny. *Comp. Appl. Biosci.* **12**:543-  
569 548.
- 570 Giannasi, D. 1978. Generic relationships in the Ulmaceae based on flavonoid chemistry.  
571 *Taxon* **27**(4):331-344.
- 572 Gilbert, J., Jansson, J., and Knight, R. 2014. The Earth Microbiome Project: Successes  
573 and aspirations. *BMC Biol.* **12**(1):69.

- 574 Givnish, T., Armes, M., McNeal, J., McKain, M., Steele, P., dePamphilis, C., Graham,  
575 S., Pires, J., Stevenson, D., Zomlefer, W., Briggs, B., Duvall, M., Moore, M.,  
576 Heaney, J., Soltis, D., Soltis, P., Thiele, K., and Leebens-Mack, J. 2010.  
577 Assembling the tree of the monocotyledons: Plastome sequence phylogeny and  
578 evolution of the Poales. *Ann. Missouri Bot. Garden* **97**(4):584-616.
- 579 Goldberger, J. 2012. Differences in bacterial and methanogen abundance between  
580 wetlands invaded by *Phragmites australis* and those inhabited by *Typha* spp.  
581 Biology, Eastern Michigan University. Ypsilanti, MI.
- 582 Grünfeld, S. and Brix, H. 1999. Methanogenesis and methane emissions: Effects of  
583 water table, substrate type and presence of *Phragmites australis*. *Aq. Bot.* **64**:63-  
584 75.
- 585 Hackstein, J. and Steinbüchel, A. 2010. *Bergey's manual of systematic bacteriology*  
586 third edition: The *Bacteroidetes*, *Spirochaetes*, *Tenericutes (Mollicutes)*,  
587 *Acidobacteria*, *Fibrobacteres*, *Fusobacteria*, *Dictyoglomi*, *Gemmatrimonadetes*,  
588 *Lentisphaerae*, *Verrucomicorbia*, *Chlamydiae*, and *Planctomycetes*. 2 ed.  
589 Springer. Athens, Georgia.
- 590 Haichar, F., Santaella, C., Heulin, T., and Achouak, W. 2014. Root exudates mediated  
591 interactions belowground. *Soil Biol. Biochem.* **77**:69-80.
- 592 Hallmann, J., Rodríguez-Kábana, R., and Kloepper, J. 1999. Chitin-mediated changes  
593 in bacterial communities of the soil, rhizosphere and within roots of cotton in  
594 relation to nematode control. *Soil Biol. Biochem.* **31**:551-560.

- 595 Hardoim, P., van Overbeek, L., and van Elsas, J. 2008. Properties of bacterial  
596 endophytes and their proposed role in plant growth. *Trends Microbiol.*  
597 **16**(10):463-471.
- 598 Hardoim, P., van Overbeek, L., Berg, G., Pirttilä, A., Compant, S., Campisano, A.,  
599 Döring, M., and Sessitsch, A. 2015. The hidden world within plants: Ecological  
600 and evolutionary considerations for defining functioning of microbial endophytes.  
601 *Microbiol. Mol. Biol. Rev.* **79**(3):293-320.
- 602 Helander, M., Sieber, S., and Petrini, O. 1993. Simulated acid rain affects birch leaf  
603 endophyte populations. *Microbial Ecol.* **26**(3):227-234.
- 604 Hobbie, S. 1992. Effects of plant species on nutrient cycling. *Trends Ecol. Evol.*  
605 **7**(10):336-339.
- 606 IPCC. 2007. *Climate change 2007: Impacts, adaptation and vulnerability*. Cambridge  
607 University Press, Cambridge, New York.
- 608 Jung, J., Lee, S., and Choi, H. 2008. Anatomical patterns of aerenchyma in aquatic and  
609 wetland plants. *J. Plant Biol.* **51**(6):428-439.
- 610 Kercher, S. and Zedler, J. 2004. Multiple disturbances accelerate invasion of reed  
611 canary grass (*Phalaris arundinacea* L.) in a mesocosm study. *Oecologia*  
612 **138**(3):455-464.
- 613 King, G. 1994. Associations of methanotrophs with the roots and rhizomes of aquatic  
614 vegetation. *Appl. Environ. Microbiol.* **60**(9):3220-3227.
- 615 Kolb, S., Knief, C., Stubner, S., and Conrad, R. 2003. Quantitative detection of  
616 methanotrophs in soil by novel *pmoA*-targeted real-time PCR assays. *Am. Soc.*  
617 *Microbiol.* **69**(5):2423-2429.

- 618 Konnerup, D., Sorrell, B., and Brix, H. 2011. Do tropical wetland plants possess  
619 convective gas flow mechanisms? *New Phytol.* **190**:379-386.
- 620 Kunda, P., Dhal, P., and Mukherjee, A. 2018. Endophytic bacterial community of rice  
621 (*Oryza sativa* L.) from coastal saline zone of West Bengal: 16S rRNA gene  
622 based metagenomics approach. *Meta Gene* **18**:79-86.
- 623 Li, Y., Zhu, J., Liu, Q., Liu, Y., Liu, M., Liu, L., and Zhang, Q. 2013. Comparison of the  
624 diversity of root-associated bacteria in *Phragmites australis* and *Typha*  
625 *angustifolia* L. in artificial wetlands. *World J. Microbiol. Biotech.* **29**:1499-1508.
- 626 Llirós, M., Trias, R., Borrego, C., and Bañeras, L. 2014. Specific archaeal communities  
627 are selected on the root surfaces of *Ruppia* spp. and *Phragmites australis*.  
628 *Wetlands* **34**(2):403-411.
- 629 Lundberg, D., Yourstone, S., Mieczkowski, P., Jones, C., and Dangl, J. 2013. Practical  
630 innovations for high-throughput amplicon sequencing. *Nat. Methods* **10**(10):999-  
631 1002.
- 632 Ma, B., Lv, X., Warren, A., and Gong, J. 2013. Shifts in diversity and community  
633 structure of endophytic bacteria and archaea across root, stem and leaf tissues  
634 in the common reed, *Phragmites australis*, along a salinity gradient in a marine  
635 tidal wetland of northern China. *Antonie van Leeuwenhoek* **104**:759-768.
- 636 Marotz, C., Amir, A., Humphrey, G., Gaffney, J., Gogul, G., and Knight, R. 2017. DNA  
637 extraction for streamlined metagenomics of diverse environmental samples.  
638 *Biotech.* **62**(6):290-293.

- 639 Mengoni, A., Schat, H., and Vangronsveld, J. 2010. Plants as extreme environments?  
640 Ni-resistant bacteria and Ni-hyperaccumulators of serpentine flora. *Plant Soil*  
641 **331**:5-16.
- 642 Megonigal, J., Hines, M., and Visscher, P. 2004. Anaerobic metabolism: Linkages to  
643 trace gases and aerobic processes. Pages 317-424 in Schlesinger, W.H.  
644 (Editor). *Biogeochemistry*. Elsevier-Pergamon, Oxford, UK.
- 645 Newell, S., Moran, M., and Hodson, R. 1995. Productivities of microbial decomposers  
646 during early stages of decomposition of leaves of a freshwater sedge. *Freshw.*  
647 *Biol* **34**(1):135-148.
- 648 Nikolausz, M., Kappelmeyer, U., Rusznyák, A., Márialigeti, K., and Kästner, M. 2008.  
649 Diurnal redox fluctuation and microbial activity in the rhizosphere of wetland  
650 plants. *Europ. J. Soil Biol.* **44**:324-333.
- 651 Oksanen, J., Kindt, R., Legendre, P., O'Hara, B., Henry, M., and Stevens, H. 2007. The  
652 vegan package. *Community Ecol. Package* **10**:631-637.
- 653 Pett-Ridge, J., and Firestone, M. 2005. Redox fluctuation structures microbial  
654 communities in a wet tropical soil. *Appl. Environ. Microbiol.* **71**(11):6998-7007.
- 655 R Core Team. 2013. R: A language and environment for statistical computing.
- 656 Raghoebarsing, A., Smolders, A., Schmid, M., Rijpstra, I., Wolters-Arts, M., Derksen, J.,  
657 Jetten, M., Schouten, S., Damste, J., Lamers, L., Roelofs, J., Op den Camp, H.,  
658 and Strous, M. 2005. Methanotrophic symbionts provide carbon for  
659 photosynthesis in peat bogs. *Nature* **436**:1153-1156.



- 660 Reich, P., Wright, I., Cavender-Bares, J., Craine, J., Oleksyn, J., Westoby, M., and  
661 Walters, M. 2003. The evolution of plant functional variation: Traits, spectra, and  
662 strategies. *Internat. J. Plant Sci.* **164**(3):143-164.
- 663 Ringeval, B., de Noblet-Decoudré, N., Ciais, P., Bousquet, P., Prignat, C., Papa, F., and  
664 Rossow, W. 2010. An attempt to quantify the impact of changes in wetland extent  
665 on methane emissions on the seasonal and interannual time scales. *Global*  
666 *Biogeochem. Cycles* **24**(2):GB2003.
- 667 Rosenblueth, M., and Martínez-Romero, E. 2006. Bacterial endophytes and their  
668 interactions with hosts. *Molec. Plant-Microbe Interact.* **19**(8):827-832.
- 669 Steinberg, L., and Regan, J. 2009. *mcrA*-targeted real-time quantitative PCR method to  
670 examine methanogen communities. *Appl. Environ. Microbiol.* **75**(13):4435-4442.
- 671 Sulman, J., Drew, B., Drummond, C., Hayasaka, E., and Sytsma, K. 2013. Systematics,  
672 biogeography, and character evolution of *Sparganium* (Typhaceae):  
673 Diversification of a widespread, aquatic lineage. *Am. J. Bot.* **100**(10):2023-2039.
- 674 Sun, L., Qiu, F., Zhang, X., Dai, X., Dong, X., and Song, W. 2008. Endophytic bacterial  
675 diversity in rice (*Oryza sativa* L.) roots estimated by 16S rDNA sequence  
676 analysis. *Microbial Ecol.* **55**(3):415-424.
- 677 Swofford, D. 2002. PAUP\*. Phylogenetic analysis using parsimony (\*and other  
678 methods). Version 4.0b10. Sinauer Associates.
- 679 Tuchman, N., Larkin, D., Geddes, P., Wildova, R., Jankowski, K., and Goldberg, D.  
680 2009. Patterns of environmental change associated with *Typha* × *glauca* invasion  
681 in a Great Lakes coastal wetland. *Wetlands* **29**(3):964-975.
- 682 USDA, N. 2017. The PLANTS Database.

- 683 Valé, M., Nguyen, C., Dambrine, E., and Dupouey, J. 2005. Microbial activity in the  
684 rhizosphere soil of six herbaceous species cultivated in a greenhouse is  
685 correlated with shoot biomass and root C concentrations. *Soil Biol. Biochem.*  
686 **37**(12):2329-2333.
- 687 Visser, E., Colmer, T., Blom, C., and Voesenek, L. 2000. Changes in growth, porosity,  
688 and radial oxygen loss from adventitious roots of selected mono- and  
689 dicotyledonous wetland species with contrasting types of aerenchyma. *Plant, Cell*  
690 *and Env.* **23**:1237-1245.
- 691 Wang, Z. and Han, X. 2005. Diurnal variation in methane emissions in relation to plants  
692 and environmental variables in the Inner Mongolia marshes. *Atm. Env.* **39**:6295-  
693 6305.
- 694 Wemheuer, F., Kaiser, K., Karlovsky, P., Daniel, R., Vidal, S., and Wemheuer, B. 2017.  
695 Bacterial endophyte communities of three agricultural important grass species  
696 differ in their response towards management regimes. *Sci. Reports* **7**:1-13.
- 697 Westermann, P., Agrubg, B., and Mah, R. 1989. Threshold acetate concentrations for  
698 acetate catabolism by aceticlastic methanogenic bacteria. *Appl. Env. Microbiol.*  
699 **55**(2):514-515.
- 700 Wetzel, P. and van der Valk, A. 1998. Effects of nutrient and soil moisture on  
701 competition between *Carex stricta*, *Phalaris arundinacea*, and *Typha latifolia*.  
702 *Plant Ecol.* **138**(2):179-190.
- 703 Wink, M. 2003. Evolution of secondary metabolites from an ecological and molecular  
704 phylogenetic perspective. *Phytochem.* **64**:3-19.

705 Winston, M., Hampton-Marcell, J., Zarraonaindia, I., Owens, S., Moreau, C., Gilbert, J.,  
706 Hartsel, J., Kennedy, S., and Gibbons, S. 2014. Understanding cultivar-specificity  
707 and soil determinants of the *Cannabis* microbiome. PLoS ONE **9**(9):e99641.  
708 Yavitt, J. and Knapp, A. 1998. Aspects of methane flow from sediment through  
709 emergent cattail (*Typha latifolia*) plants. New Phytol. **129**:495-503.  
710 Zarraonaindia, I., Owens, S., Weisenorn, P., West, K., Hampton-Marcell, J., Lax, S.,  
711 Bokulich, N., Mills, D., Martin, G., Taghavi, S., van der Lelie, D., and Gilbert, J.  
712 2015. The soil microbiome influences grapevine-associated microbiota. mBIO  
713 **6**(2):e02527-14.  
714
